# Supplementary material
Source: PubMed Central journal article supplement (PMC6643463)
Supplement: ao7b01008_si_001.pdf [file ao7b01008_si_001.pdf]

SUPPORTING INFORMATION TO:

**Single-step rapid diagnosis of dopamine and serotonin metabolism disorders**

Aurélien Lo,<sup>1</sup> Pierre Guibal,<sup>1</sup> Diane Doummar,<sup>2</sup> Diana Rodriguez,<sup>2</sup> Jean-Yves Hautem,<sup>2</sup> Rémy Couderc,<sup>2</sup> Thierry Billette De Villemeur,<sup>2</sup> Emmanuel Roze,<sup>3,4</sup> Pierre Chaminade,<sup>1</sup> and Fathi Moussa<sup>\*,1,2</sup>

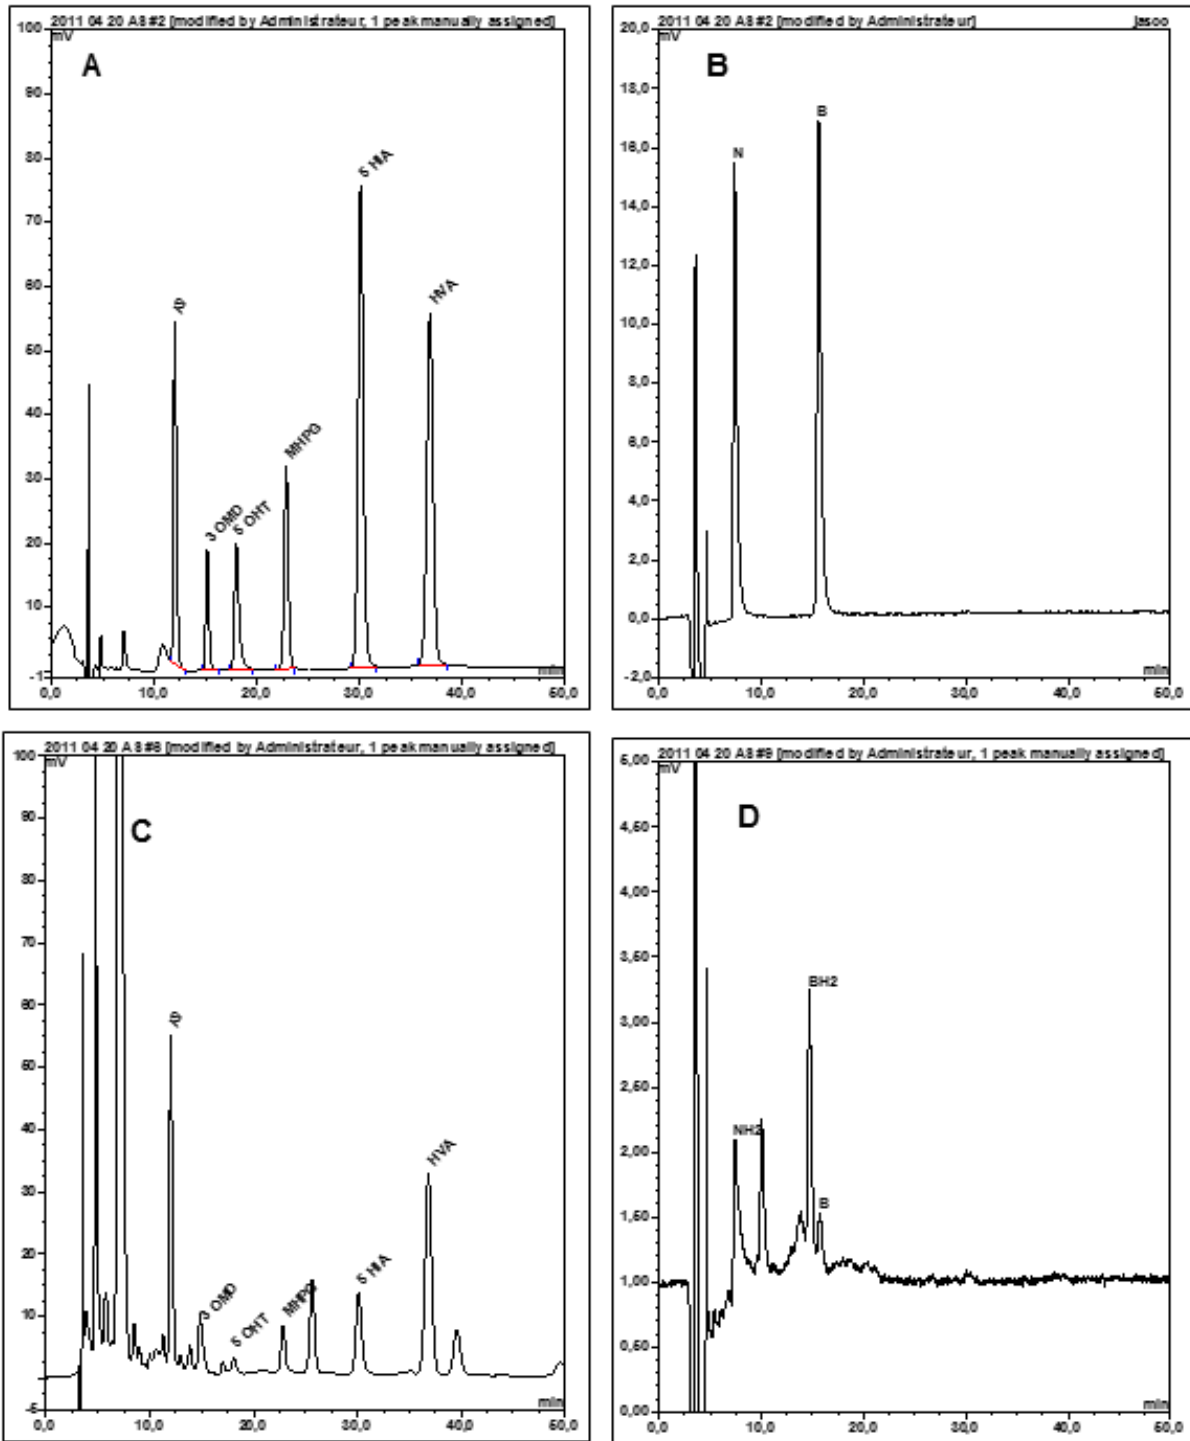

**Figure S1:** HPLC profiles of a standard mixture with (A) electrochemical detection followed by (B) sequential fluorescence detection, and a CSF sample of a patient from the control group with (C) electrochemical detection and (D) sequential fluorescence detection. Chromatographic conditions: column 4.6 x 150 mm, 3  $\mu$ m Atlantis T3 (Waters, France); mobile phase: pH 5.2, 0.05 M citrate buffer/methanol (97/3, v/v). Flow rate: 0.5 mL/min at 30°C

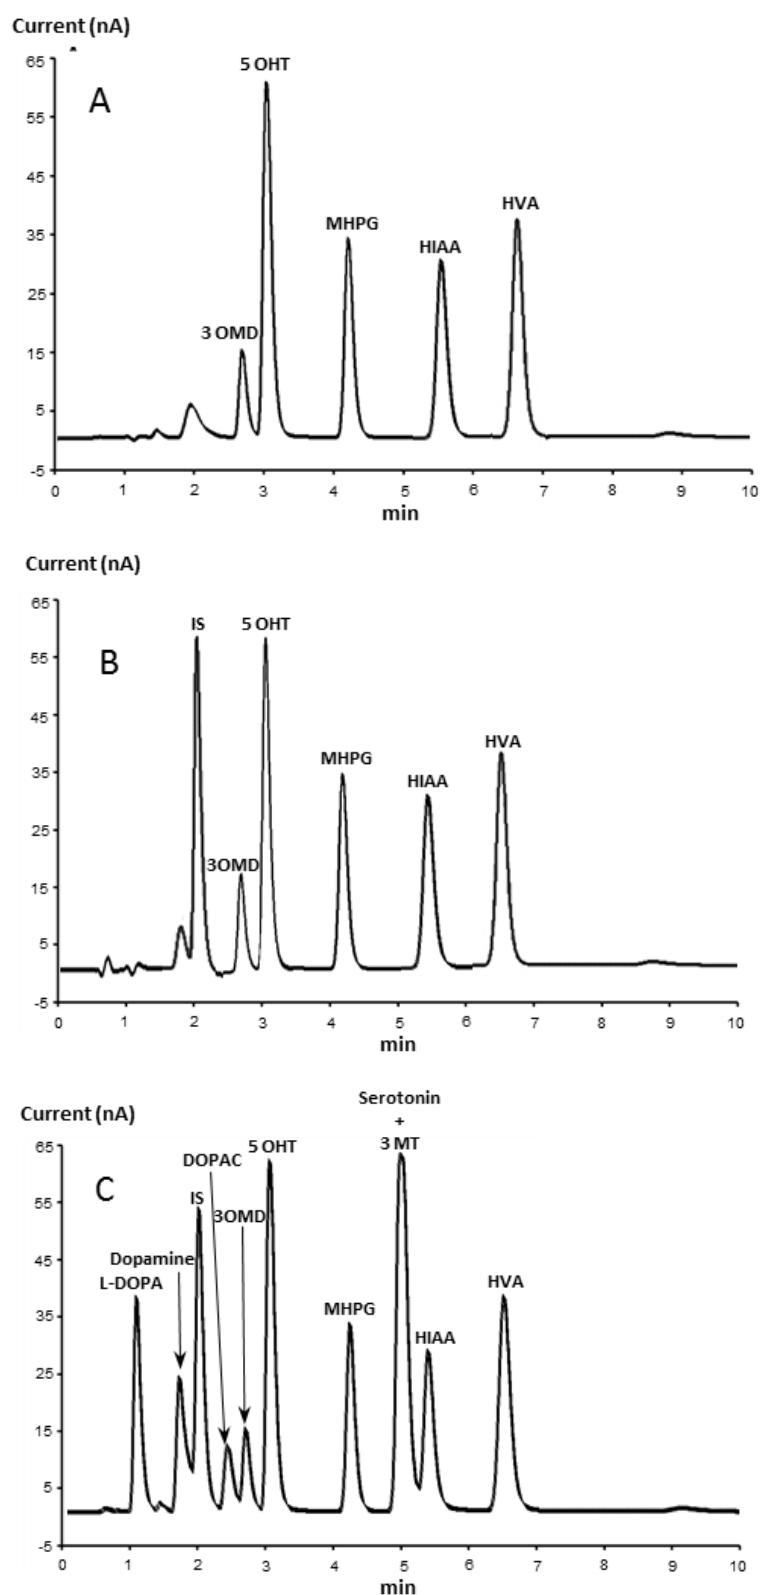

**Figure S2.** Chromatographic profiles of several metabolites (500 nM) obtained with the proposed method: (A) Standard mixture containing the targeted metabolites 3 OMD, 5 OHT (or 5-HTp), MHPG, HIAA, and HVA; (B) Addition of the IS to mixture A, and (C) Addition of L-DOPA, dopamine, DOPAC, serotonin, and 3 methoxy-tyramine (MT) to mixture B.

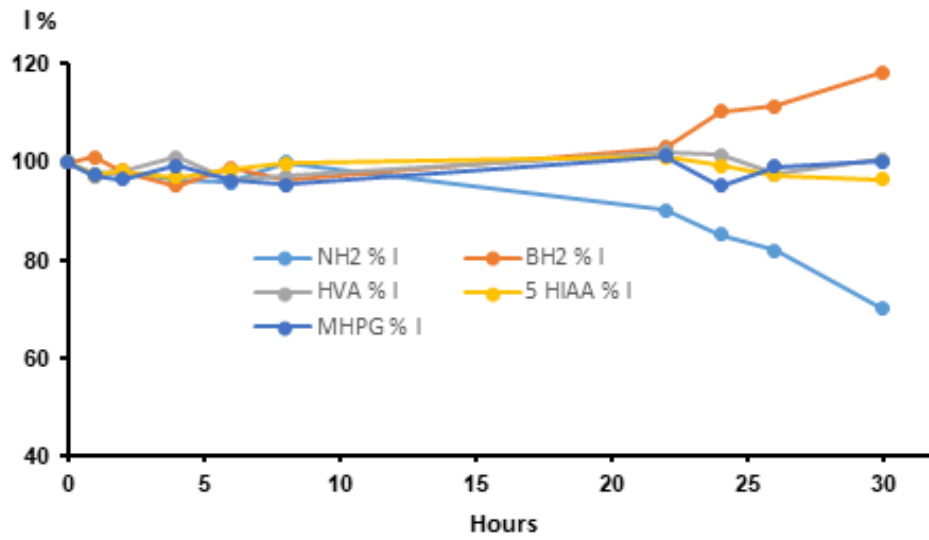

**Figure S3:** Stability of the analytes in the auto-sampler (10 °C, in the dark). I % = relative intensity vs initial intensity (Time 0; 100 %)

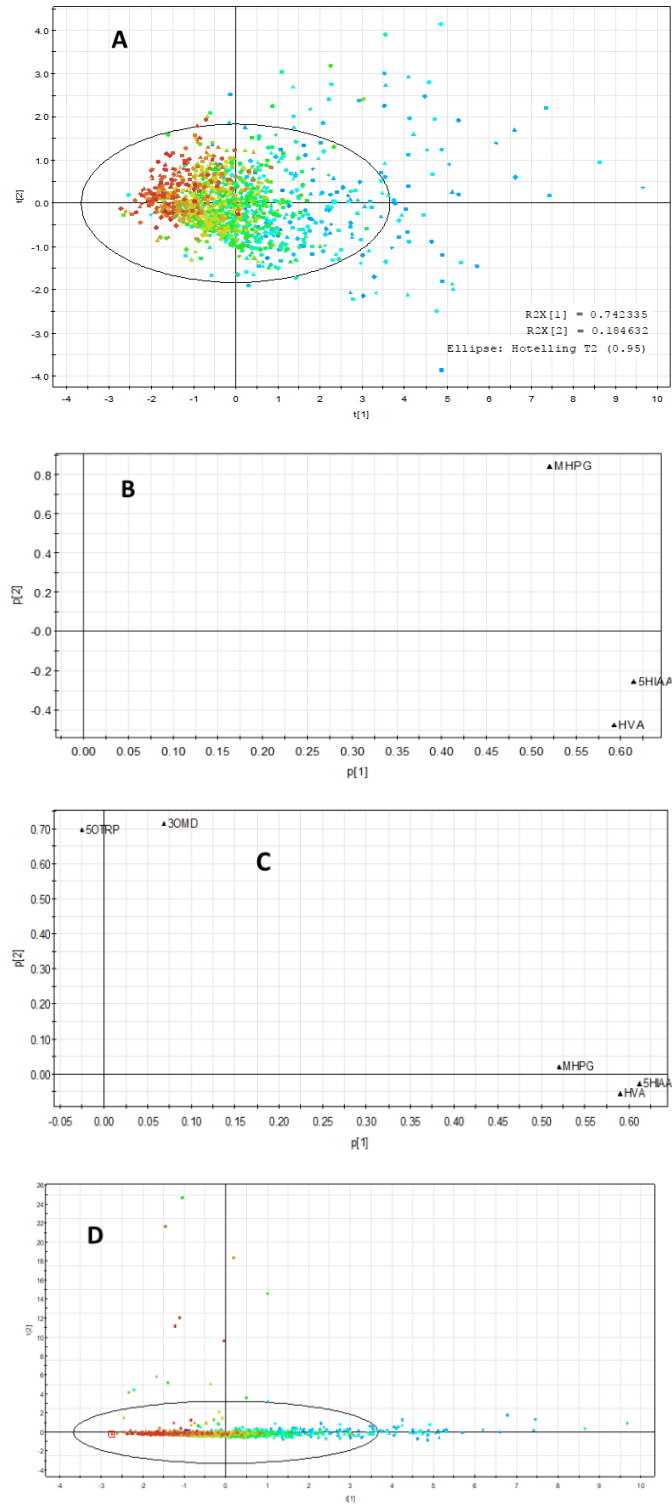

**Figure S4.** PCA results: (A) Score plot and (B) loading plot obtained after considering HVA, 5 HIAA, and MHPG, only, (C) loading plot after adding 3-OMD and 5-HTrp, and (D) score plot evolution after adding 3-OMD, 5-HTrp, and BH2.

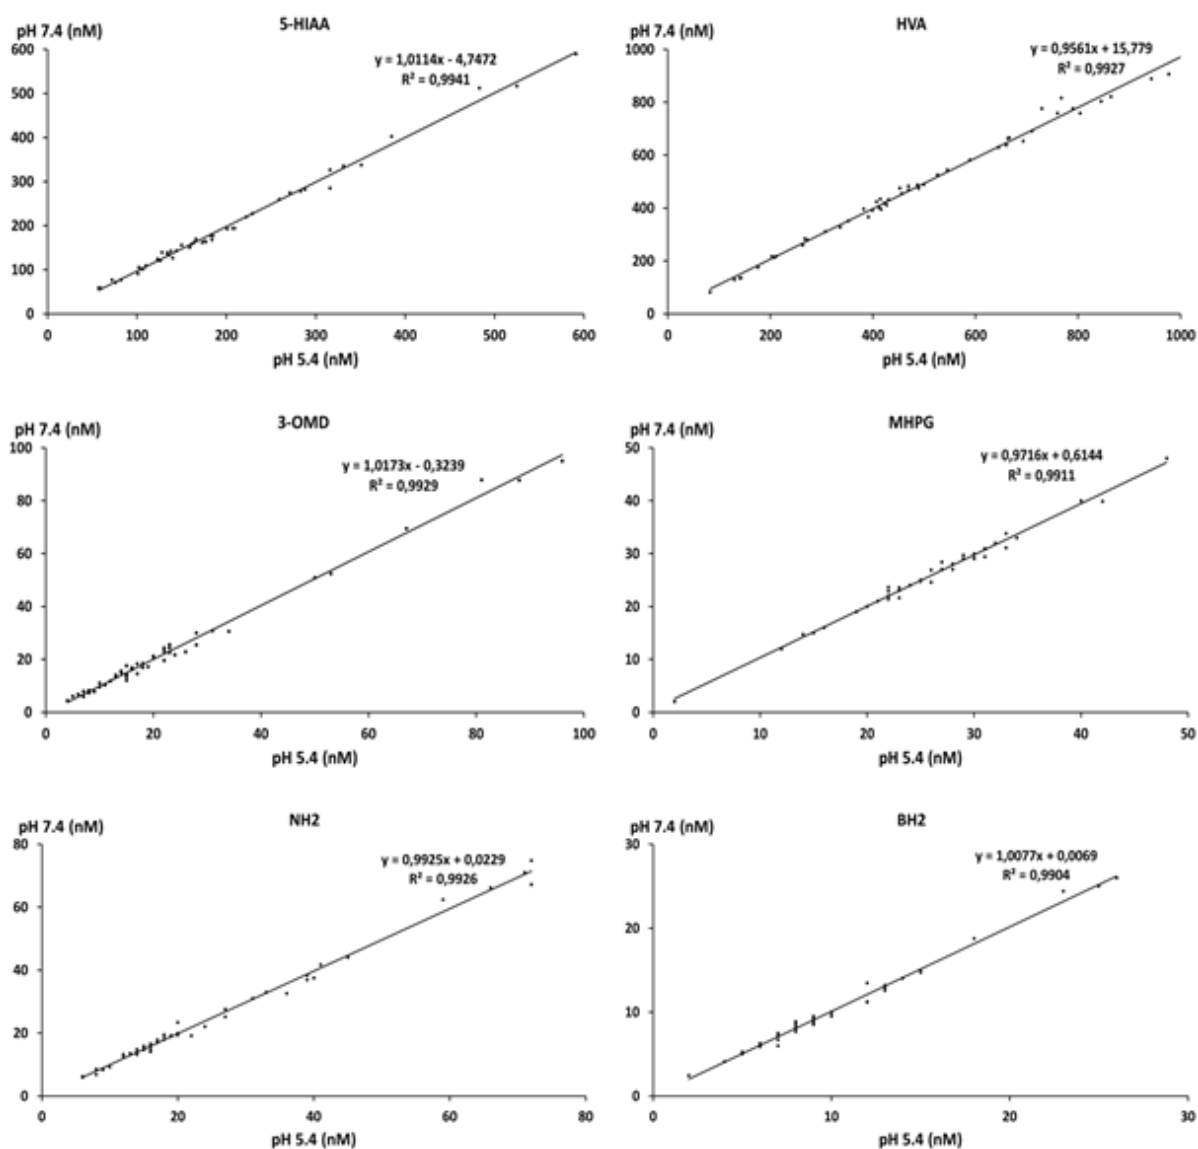

**Figure S5:** Correlation between the results obtained with the proposed methods at pH 5.2 and at pH 7.4.

**Table S1:** Linearity of the proposed method at pH 5.2

| Analyte | LOQ<br>nM | Slope | Intercept | R <sup>2</sup> | Sy/x <sup>a</sup> | Sa <sup>b</sup> | Sb <sup>c</sup> |
|---------|-----------|-------|-----------|----------------|-------------------|-----------------|-----------------|
| 3 OMD   | 5         | 976   | - 2822    | 0.9997         | 2939              | 2.9             | 672             |
| 5 OHT   | 5         | 1079  | - 8492    | 0.9993         | 4892              | 4.8             | 1119            |
| MHPG    | 5         | 2012  | - 873     | 0.9998         | 4535              | 4.4             | 1037            |
| 5 HIAA  | 10        | 1131  | - 24621   | 0.9970         | 22153             | 10.8            | 5121            |
| HVA     | 15        | 970   | - 3464    | 0.9999         | 3325              | 1.1             | 761             |
| N       | 5         | 1958  | - 1801    | 0.9968         | 3969              | 21.1            | 1089            |
| NH2     | 5         | 1386  | - 1550    | 0.9918         | 3859              | 22.3            | 1168            |
| BH2     | 5         | 1339  | - 1622    | 0.9947         | 3436              | 20.0            | 1029            |
| B       | 5         | 2471  | - 1059    | 0.9936         | 7048              | 37.5            | 1933            |

LOQ: limit of quantification; <sup>a</sup> Standard error of the estimate; <sup>b</sup> Standard error of the slope; <sup>c</sup> Standard error of the intercept. 5 OHT (or 5-HTp).

**Table S2:** Analytical recovery and accuracy of the proposed method at pH 5.2. (5-OHT = 5HT<sub>1p</sub>)

| Analytes        | Standard solutions (n = 6) |                  |                    | Authentic CSF (n = 6)    |                             |              |                   | p-values |
|-----------------|----------------------------|------------------|--------------------|--------------------------|-----------------------------|--------------|-------------------|----------|
|                 | Concentration (nM)         | Within-run (CV%) | Between-run (CV %) | Added concentration (nM) | Measured concentration (nM) | Recovery (%) | Within-run CV (%) |          |
| 3-OMD           | 0                          | -                | -                  | 0                        | 30                          | -            | 8.9               |          |
|                 | 5                          | 6.8              | 6.5                | 5                        | -                           | -            | -                 |          |
|                 | 25                         | 5.0              | 7.5                | 25                       | 56                          | 101.8        | 7.5               | 0.0515   |
|                 | 62.5                       | 3.0              | 4.0                | 62.5                     | 91                          | 98.4         | 8.7               | 0.0536   |
|                 | 125                        | 1.5              | 2.0                | 125                      | -                           | -            | -                 |          |
|                 | 250                        | 0.9              | 2.0                | 250                      | 266                         | 95.0         | 4.8               | 0.0576   |
| 5-OHT           | 0                          | -                | -                  | 0                        | 24                          | -            | 7.2               |          |
|                 | 5                          | 7.2              | 9.3                | 5                        | -                           | -            | -                 |          |
|                 | 25                         | 4.0              | 8.6                | 25                       | 48                          | 98.6         | 9.5               | 0.2571   |
|                 | 62.5                       | 2.7              | 7.1                | 62.5                     | 88                          | 101.7        | 8.6               | 0.9098   |
|                 | 125                        | 2.9              | 4.5                | 125                      | -                           | -            | -                 |          |
|                 | 250                        | 1.5              | 2.8                | 250                      | 263                         | 96.0         | 7.7               | 0.0508   |
| MHPG            | 0                          | -                | -                  | 0                        | 21                          | -            | 9.4               |          |
|                 | 5                          | 2.7              | 6.2                | 5                        | -                           | -            | -                 |          |
|                 | 25                         | 2.6              | 7.4                | 25                       | 48                          | 104.3        | 6.9               | 0.6734   |
|                 | 62.5                       | 1.3              | 3.5                | 62.5                     | 81                          | 97.0         | 5.1               | 0.8737   |
|                 | 125                        | 0.9              | 2.7                | 125                      | -                           | -            | -                 |          |
|                 | 250                        | 0.9              | 2.6                | 250                      | 266                         | 98.2         | 1.4               | 0.0527   |
| 5 HIAA          | 0                          | -                | -                  | 0                        | 113                         | -            | 8.5               |          |
|                 | 10                         | 6.1              | 9.7                | 10                       | -                           | -            | -                 |          |
|                 | 50                         | 5.5              | 8.9                | 50                       | 158                         | 96.9         | 8.6               | 0.8418   |
|                 | 125                        | 5.0              | 5.6                | 125                      | 240                         | 100.8        | 6.8               | 0.0860   |
|                 | 250                        | 4.2              | 8.8                | 250                      | -                           | -            | -                 |          |
|                 | 500                        | 4.2              | 6.6                | 500                      | 596                         | 97.2         | 2.8               | 0.3197   |
| HVA             | 0                          | -                | -                  | 0                        | 370                         | -            | 8.1               |          |
|                 | 15                         | 2.3              | 5.7                | 15                       | -                           | -            | -                 |          |
|                 | 75                         | 1.1              | 5.7                | 75                       | 437                         | 98.2         | 6.6               | 0.1700   |
|                 | 187.5                      | 0.7              | 3.7                | 187.5                    | 560                         | 100.3        | 5.1               | 0.3810   |
|                 | 375                        | 0.6              | 3.0                | 375                      | -                           | -            | -                 |          |
|                 | 750                        | 0.4              | 2.6                | 750                      | 1105                        | 98.7         | 2.8               | 0.0613   |
| NH <sub>2</sub> | 0                          | -                | -                  | 0                        | 11                          | -            | 2.8               |          |
|                 | 5                          | 4.9              | 7.5                | 5                        | 15                          | 93.8         | 7.4               | 0.4965   |
|                 | 12.5                       | 7.6              | 7.1                | 12.5                     | 22                          | 93.6         | 3.8               | 0.0628   |
|                 | 25                         | 6.8              | 8.7                | 25                       | -                           | -            | -                 |          |
|                 | 50                         | 5.4              | 6.4                | 50                       | 56                          | 91.8         | 5.7               | 0.0556   |
|                 | 100                        | 3.4              | 7.4                | 100                      | -                           | -            | -                 |          |
| BH <sub>2</sub> | 0                          | -                | -                  | 0                        | 22                          | -            | 4.5               |          |
|                 | 5                          | 5.6              | 7.9                | 5                        | 26                          | 96.3         | 6.4               | 0.6612   |
|                 | 12.5                       | 6.3              | 5.7                | 12.5                     | 33                          | 95.7         | 6.3               | 0.5649   |
|                 | 25                         | 5.9              | 8.5                | 25                       | -                           | -            | -                 |          |
|                 | 50                         | 6.7              | 6.3                | 50                       | 69                          | 95.8         | 8.7               | 0.2674   |
|                 | 100                        | 4.7              | 6.2                | 100                      | -                           | -            | -                 |          |
| B               | 0                          | -                | -                  | 0                        | 10                          | -            | 9.0               |          |
|                 | 5                          | 8.9              | 9.7                | 5                        | 14                          | 93.3         | 4.2               | 0.6776   |
|                 | 12.5                       | 5.4              | 7.0                | 12.5                     | 23                          | 102.2        | 3.4               | 0.2423   |
|                 | 25                         | 8.8              | 6.3                | 25                       | -                           | -            | -                 |          |
|                 | 50                         | 7.4              | 6.5                | 50                       | 59                          | 98.3         | 4.3               | 0.4988   |
|                 | 100                        | 4.9              | 7.2                | 100                      | -                           | -            | -                 |          |



**Table S3:** p value as a result of Shapiro Wilk normality test on population and log transformed population.

| p - value     | HVA      |        | 5 HIAA   |        | HVA / 5 HIAA |        | MHPG     |        | 3 OMD    |        | NEOP     |        | BH2      |        |
|---------------|----------|--------|----------|--------|--------------|--------|----------|--------|----------|--------|----------|--------|----------|--------|
|               | nom      | log    | nom      | log    | nom          | log    | norm     | log    | nom      | log    | nom      | log    | norm     | log    |
| 0 – 30 days   | 0.5296   | 0.0884 | 0.2902   | 0.0139 | 0.3094       | 0.6882 | 0.4354   | 0.7996 | 0.3916   | 0.3094 | 0.3876   | 0.5830 | 0.0639   | 0.3504 |
| 1 – 6 months  | 0.2688   | 0.1908 | 0.0012   | 0.9786 | 0.0001       | 0.5465 | < 0.0001 | 0.0053 | < 0.0001 | 0.0306 | < 0.0001 | 0.0779 | < 0.0001 | 0.1327 |
| 0.5 – 3 years | 0.0012   | 0.4707 | < 0.0001 | 0.0012 | < 0.0001     | 0.3737 | < 0.0001 | 0.6965 | < 0.0001 | 0.0758 | < 0.0001 | 0.0044 | < 0.0001 | 0.0087 |
| 3 – 7 years   | < 0.0001 | 0.8886 | < 0.0001 | 0.5082 | 0.0003       | 0.3644 | < 0.0001 | 0.0170 | < 0.0001 | 0.0008 | < 0.0001 | 0.8843 | < 0.0001 | 0.0805 |
| 7- 11 years   | 0.0018   | 0.0931 | 0.0001   | 0.3896 | 0.0011       | 0.0699 | < 0.0001 | 0.1525 | < 0.0001 | 0.0188 | 0.0001   | 0.5168 | < 0.0001 | 0.8617 |
| 11- 16 years  | 0.1294   | 0.3268 | 0.1084   | 0.4421 | 0.0001       | 0.0777 | 0.0001   | 0.5520 | < 0.0001 | 0.0144 | 0.0002   | 0.7117 | < 0.0001 | 0.4109 |
| Over 16 years | < 0.0001 | 0.9252 | < 0.0001 | 0.0074 | 0.0001       | 0.6569 | 0.001    | 0.1986 | < 0.0001 | 0.4773 | 0.0006   | 0.9284 | < 0.0001 | 0.1130 |

**Table S4. Linearity of the method with a mobile phase pH set at 7.4. (5 OHT = 5-HTrp)**

| Analyte | LOQ nM | Slope | Intercept | R <sup>2</sup> | S <sub>y/x</sub> | S <sub>a</sub> | S <sub>b</sub> |
|---------|--------|-------|-----------|----------------|------------------|----------------|----------------|
| 3-OMD   | 6,1    | 1971  | -2973     | 0,9998         | 3499             | 967            | 7,1            |
| 5-OHT   | 6,6    | 1682  | 705       | 0,9998         | 3451             | 954            | 6,9            |
| 5-HIAA  | 9,4    | 1651  | -1816     | 0,9989         | 5969             | 1650           | 6,5            |
| HVA     | 10,0   | 1803  | 6852      | 0,9999         | 6242             | 1725           | 6,5            |
| MHPG    | 3,5    | 4421  | -1013     | 0,9999         | 7466             | 2063           | 17,5           |
| N       | 2,4    | 10842 | -60626    | 0,9991         | 2660             | 735            | 14,4           |
| NH2     | 3,2    | 6055  | -1070     | 0,9995         | 3086             | 2070           | 83,4           |
| B       | 1,6    | 11291 | -67127    | 0,9994         | 2930             | 810            | 15,7           |
| BH2     | 3,2    | 6584  | -2313     | 0,9997         | 1923             | 533            | 12,8           |
| BH4     | 4,2    | 4817  | 7871      | 0,998          | 3481             | 1626           | 97,2           |

**Table S5:** Analytical recovery and accuracy of the method with mobile phase pH set at 7.4.

| Analytes | Standard solution (n = 6) |                  |                    | Authentic CSF (n = 6)    |                             |              |                   |
|----------|---------------------------|------------------|--------------------|--------------------------|-----------------------------|--------------|-------------------|
|          | Concentration (nM)        | Within-run (CV%) | Between-run (CV %) | Added concentration (nM) | Measured concentration (nM) | Recovery (%) | Within-run CV (%) |
| 3-OMD    | 0                         | -                | -                  | 0                        | 15,1                        | -            | 5,5               |
|          | 17,4                      | 0,8              | 2,6                | 16,5                     | -                           | -            | -                 |
|          | 33,1                      | 0,4              | 3,0                | 33                       | 48,5                        | 101,1        | 4,4               |
|          | 65,4                      | 0,7              | 2,8                | 66                       | 83,7                        | 103,9        | 1,9               |
|          | 131,0                     | 2,5              | 2,6                | 132                      | 142,7                       | 96,6         | 4,6               |
|          | 264,6                     | 0,4              | 2,0                | 264                      | 280,6                       | 100,6        | 3,3               |
| 5-OHT    | 0                         | -                | -                  | 0                        | 14,6                        | -            | 0,0               |
|          | 17,4                      | 3,4              | 8,1                | 16,6                     | -                           | -            | -                 |
|          | 33,3                      | 1,0              | 9,2                | 33,3                     | 48,2                        | 101,2        | 10,4              |
|          | 66,0                      | 0,5              | 7,6                | 66,5                     | 87,5                        | 109,6        | 4,9               |
|          | 132,2                     | 2,5              | 9,0                | 133                      | 146,9                       | 99,5         | 5,3               |
|          | 266,5                     | 0,7              | 12,3               | 266                      | 279,3                       | 99,5         | 7,6               |
| 5-HIAA   | 0                         | -                | -                  | 0                        | 100,6                       | -            | 6,9               |
|          | 31,6                      | 3,2              | 4,2                | 31                       | -                           | -            | -                 |
|          | 61,8                      | 0,9              | 4,4                | 61,9                     | 166,0                       | 105,5        | 5,0               |
|          | 123,3                     | 0,6              | 4,7                | 123,9                    | 231,4                       | 105,5        | 3,8               |
|          | 247,6                     | 2,1              | 3,6                | 247,8                    | 347,8                       | 99,8         | 5,3               |
|          | 495,7                     | 0,7              | 5,1                | 495,5                    | 594,3                       | 99,6         | 3,4               |
| HVA      | 0                         | -                | -                  | 0                        | 251,7                       | -            | 4,7               |
|          | 32,4                      | 0,3              | 2,9                | 31,9                     | -                           | -            | -                 |
|          | 63,9                      | 0,2              | 2,8                | 63,8                     | 318,0                       | 103,9        | 1,4               |
|          | 128,2                     | 0,6              | 3,9                | 127,6                    | 391,7                       | 109,7        | 1,5               |
|          | 253,4                     | 2,4              | 3,1                | 255,3                    | 504,6                       | 99,1         | 3,4               |
|          | 511,2                     | 0,4              | 6,4                | 510,5                    | 760,0                       | 99,6         | 2,0               |
| MHPG     | 0                         | -                | -                  | 0                        | 12,4                        | -            | 7,5               |
|          | 15,2                      | 0,4              | 3,2                | 14,3                     | -                           | -            | -                 |
|          | 28,8                      | 0,3              | 3,2                | 28,6                     | 42,0                        | 103,2        | 8,1               |
|          | 56,8                      | 0,7              | 4,0                | 57,3                     | 69,6                        | 99,9         | 4,8               |
|          | 113,2                     | 2,5              | 2,4                | 114,5                    | 126,3                       | 99,5         | 6,4               |
|          | 229,7                     | 0,4              | 3,6                | 229                      | 241,6                       | 100,1        | 3,3               |
| N        | 0                         | -                | -                  | 0                        | n.d.                        | -            | n.d.              |
|          | 6,9                       | 4,7              | 2,3                | 6,2                      | -                           | -            | -                 |
|          | 12,5                      | 2,1              | 7,2                | 12,3                     | 13,3                        | 107,6        | 8,3               |
|          | 24,4                      | 2,4              | 5,0                | 24,7                     | 25,5                        | 103,1        | 6,8               |
|          | 48,2                      | 1,9              | 7,0                | 49,4                     | 50,5                        | 102,3        | 3,8               |
|          | 99,3                      | 0,8              | 1,0                | 98,8                     | 97,9                        | 99,1         | 1,2               |
| NH2      | 0                         | -                | -                  | 0                        | n.d.                        | -            | n.d.              |
|          | 7,2                       | 4,9              | 9,9                | 6,2                      | -                           | -            | -                 |
|          | 12,7                      | 3,2              | 5,9                | 12,3                     | 12,5                        | 101,1        | 8,9               |
|          | 24,5                      | 2,1              | 6,3                | 24,7                     | 26,4                        | 106,9        | 4,3               |
|          | 47,0                      | 3,2              | 5,1                | 49,4                     | 49,5                        | 100,3        | 3,6               |
|          | 99,8                      | 0,4              | 5,8                | 98,7                     | 98,2                        | 99,5         | 3,9               |
| B        | 0                         | -                | -                  | 0                        | n.d.                        | -            | n.d.              |
|          | 6,5                       | 6,2              | 6,1                | 6,3                      | -                           | -            | -                 |
|          | 12,2                      | 3,7              | 4,8                | 12,5                     | 11,6                        | 92,8         | 5,7               |
|          | 25,3                      | 2,8              | 5,0                | 25                       | 25,8                        | 103,2        | 7,0               |
|          | 49,6                      | 1,8              | 6,1                | 50                       | 49,9                        | 99,8         | 2,4               |
|          | 100,1                     | 0,6              | 0,6                | 100                      | 100,0                       | 100,0        | 3,0               |
| BH2      | 0                         | -                | -                  | 0                        | n.d.                        | -            | n.d.              |
|          | 6,1                       | 5,0              | 6,6                | 6,2                      | -                           | -            | -                 |
|          | 12,3                      | 4,5              | 3,1                | 12,3                     | 15,4                        | 124,6        | 2,8               |
|          | 24,6                      | 2,8              | 5,7                | 24,7                     | 28,0                        | 113,6        | 7,3               |
|          | 49,7                      | 2,7              | 9,0                | 49,3                     | 47,2                        | 95,8         | 11,3              |
|          | 98,4                      | 2,4              | 9,1                | 98,6                     | 98,4                        | 99,8         | 5,9               |
| BH4      | 0                         | -                | -                  | 0                        | n.d.                        | -            | n.d.              |
|          | 12,9                      | 5,7              | 9,9                | 12,4                     | 13,6                        | 109,8        | 6,9               |
|          | 19,6                      | 9,0              | 8,9                | 18,6                     | -                           | -            | -                 |
|          | 23,7                      | 2,7              | 7,7                | 24,8                     | 26,4                        | 106,7        | 9,2               |
|          | 35,2                      | 3,3              | 3,3                | 37,1                     | -                           | -            | -                 |
|          | 51,0                      | 2,2              | 4,2                | 49,5                     | 56,9                        | 114,9        | 7,9               |
|          | -                         | -                | -                  | 99                       | 94,7                        | 95,7         | 2,5               |
